# Supplementary material
Source: Royal Society of Chemistry journal article supplement (doi:10.1039/d6ta00604c)
Supplement: d6ta00604c1.pdf [file d6ta00604c1.pdf]

## Supporting Information

### Highly dispersed Ga<sub>2</sub>O<sub>3</sub> integrated mesoporous $\gamma$ -Al<sub>2</sub>O<sub>3</sub> nanocomposites (Al<sub>10</sub>Ga<sub>x</sub>O<sub>y</sub>) for enhanced hydrogen production by dimethyl ether steam reforming reaction

Simi Saju,<sup>a</sup> Sivaraj Rajendran,<sup>a,b</sup> Anju Mathew,<sup>a,c</sup> Bindhya M. Babu,<sup>a,d</sup> Rimal Isaac R S,<sup>e</sup> Biplab Ghosh,<sup>f</sup> Yusuke Yamada<sup>g,h\*</sup> and Thomas Mathew,<sup>a,g\*</sup>

<sup>a</sup>Department of Chemistry, St. John's College (Affil. University of Kerala), Anchal, Kerala – 691306, India, E-Mail: thomasmathew@stjohns.ac.in; thomasm74@gmail.com

<sup>b</sup>Department of Sciences and Humanities, Christ University, Bengaluru, Karnataka 560076, India.

<sup>c</sup>Department of Chemistry, St. Stephens College (Affiliated to University of Kerala), Pathanapuram, Kerala, India.

<sup>d</sup>Department of Chemistry, St. Gregorios College (Affiliated to University of Kerala), Kottarakara, Kerala, India.

<sup>e</sup>Department of Nanotechnology, Noorul Islam Centre for Higher Education, Kumaracoil, Tamil Nadu – 629180, India.

<sup>f</sup>Beamline Development & Application Section, Bhabha Atomic Research Center, Mumbai 400085, India.

<sup>g</sup>Research Institute for Ubiquitous Energy Devices, National Institute of Advanced Industrial Science and Technology, 1-8-31 Midorigaoka, Ikeda, Osaka 563-8577, Japan.

<sup>h</sup>Present Address: Department of Chemistry and Bioengineering, Osaka Metropolitan University, Osaka 558-8585, Japan. Email: ymd@omu.ac.jp; Fax: +81-6-6605-2693.

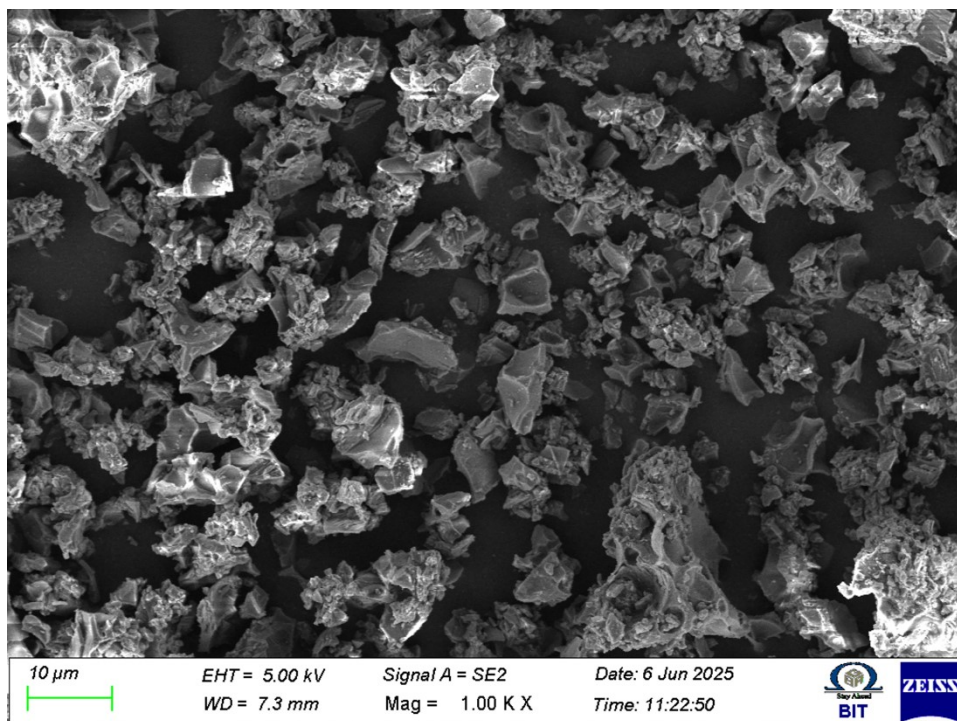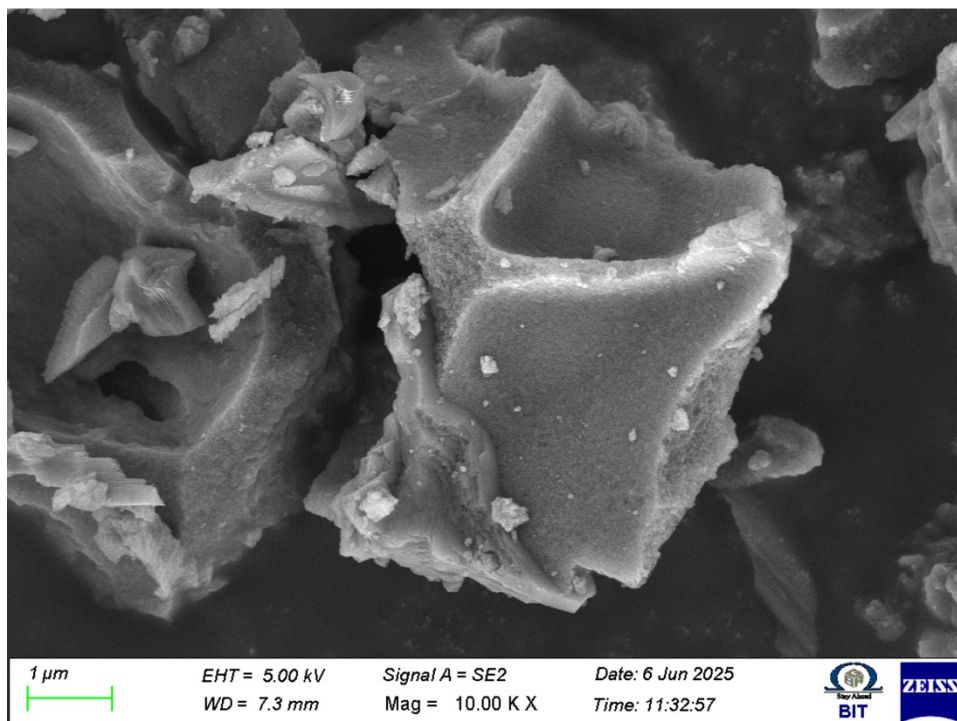

**Figure S1.** FE SEM images of mesoporous  $\text{Al}_{10}\text{Ga}_1$

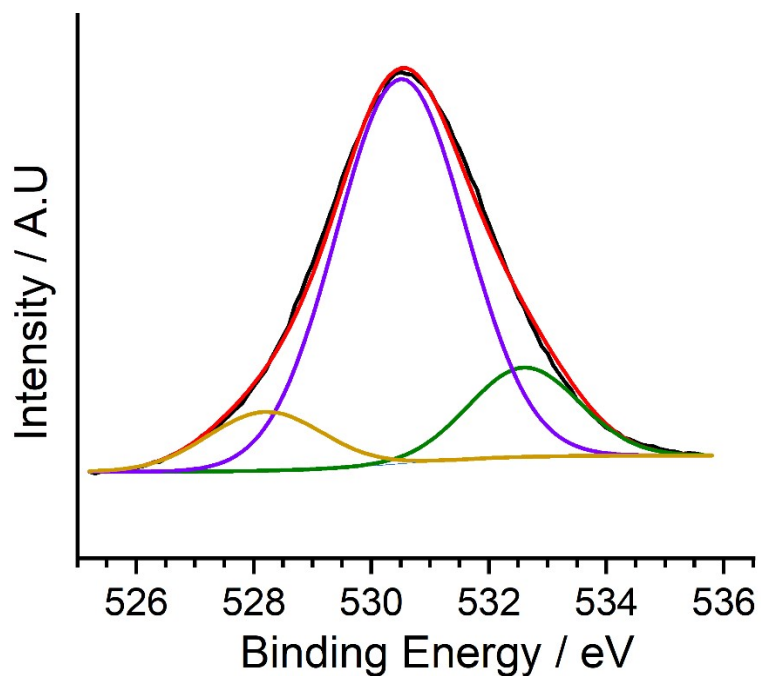

**Figure S2.** The deconvoluted O 1s core level XPS of mesoporous Al<sub>10</sub>Ga<sub>1</sub>.

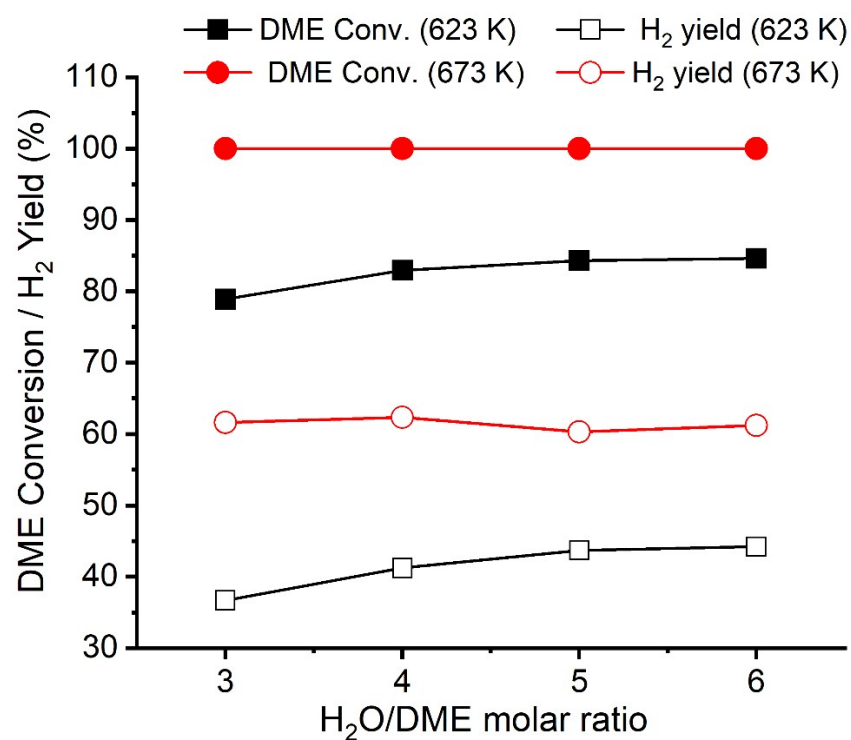

**Figure S3.** The effect of H<sub>2</sub>O/DME molar ratio on DME conversion and H<sub>2</sub> yield on mesoporous Al<sub>10</sub>Ga<sub>2</sub> at 623-673 K.

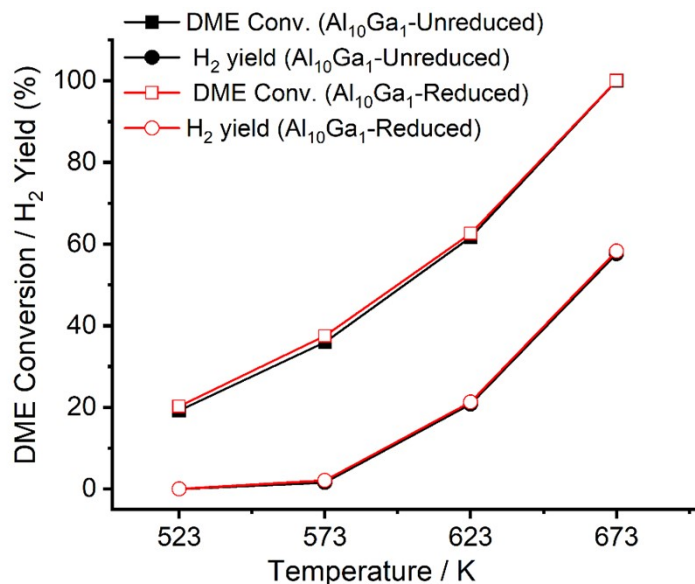

**Figure S4.** A comparison of the DME SR activity of mesoporous Al<sub>9</sub>Ga<sub>1</sub> catalyst with and without pre-reduction treatment. Pre-reduction treatment of Al<sub>10</sub>Ga<sub>1</sub> was carried out with 10% H<sub>2</sub> at 623 K for 30 minutes.

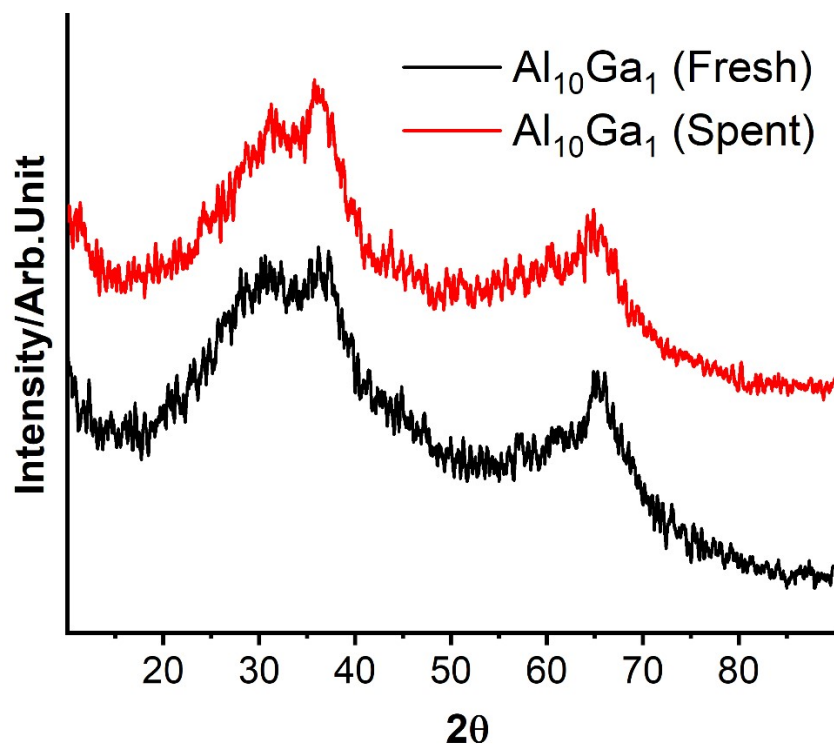

**Figure S5.** A comparison of the fresh and spent mesoporous Al<sub>9</sub>Ga<sub>1</sub> catalyst. Spent Al<sub>9</sub>Ga<sub>1</sub> catalyst was obtained after time-on-stream (TOS) study for 12 h at 673 K.

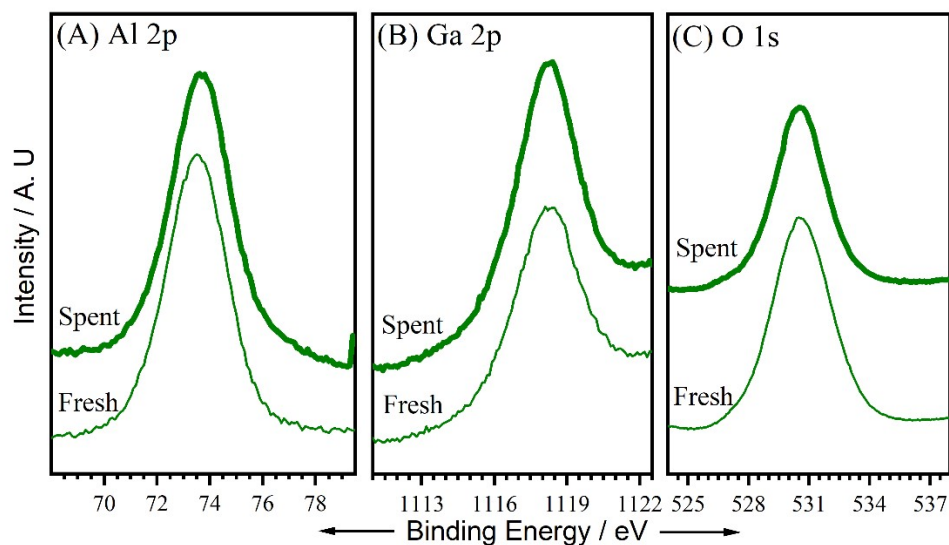

**Figure S6.** XPS spectra of (A) Al 2p, (B) Ga 2p, and (C) O 1s core levels from fresh and spent  $\text{Al}_{10}\text{Ga}_1$  catalysts. Spent  $\text{Al}_9\text{Ga}_1$  catalyst was obtained after TOS study for 12 h at 673 K.

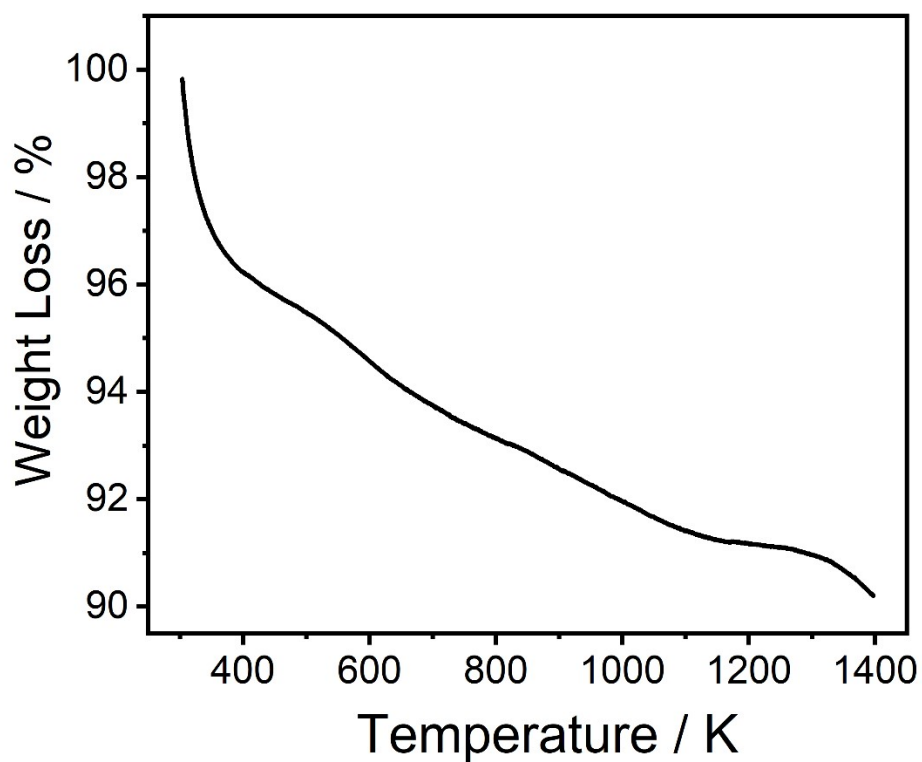

**Figure S7.** The thermogravimetric (TG) analysis of the spent  $\text{Al}_{10}\text{Ga}_1$  catalyst obtained after TOS study for 12 h at 673 K.

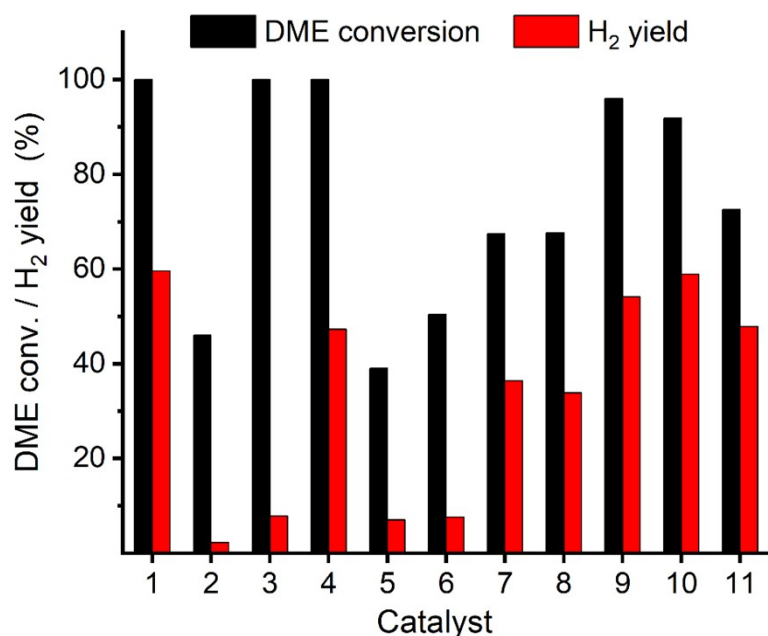

**Figure S8.** A comparison of the DME SR activity of mesoporous  $\text{Al}_9\text{Ga}_1$  catalyst with mesoporous  $\text{Al}_9\text{M}_1$  (where  $\text{M} = \text{Ti}$  to  $\text{Zn}$ ) and non-mesoporous  $\text{Al}_9\text{Ga}_1$  oxide catalysts at 673 K. The catalyst labels are 1. mesoporous  $\text{Al}_9\text{Ga}_1$ , 2 to 10 are mesoporous  $\text{Al}_9\text{M}_1$  catalysts (2.  $\text{Al}_9\text{Ti}_1$ , 3.  $\text{Al}_9\text{V}_1$ , 4.  $\text{Al}_9\text{Cr}_1$ , 5.  $\text{Al}_9\text{Mn}_1$ , 6.  $\text{Al}_9\text{Fe}_1$ , 7.  $\text{Al}_9\text{Co}_1$ , 8.  $\text{Al}_9\text{Ni}_1$ , 9.  $\text{Al}_9\text{Cu}_1$ , and 10.  $\text{Al}_9\text{Zn}_1$ ), and 11. non-mesoporous  $\text{Al}_9\text{Ga}_1$ .

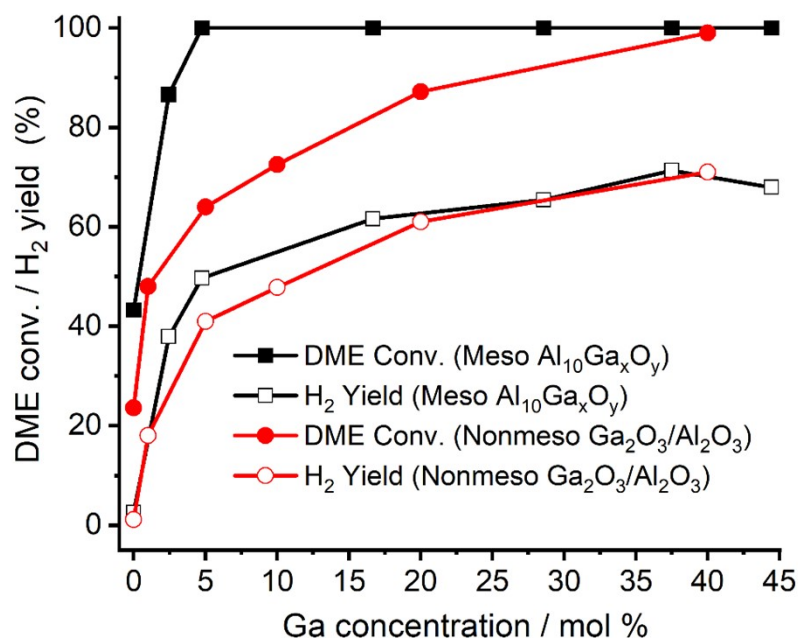

**Figure S9.** A comparison of the DME SR activity of mesoporous  $\text{Al}_{10}\text{Ga}_x\text{O}_y$  catalysts in this study and non-mesoporous  $\text{Ga}_2\text{O}_3/\text{Al}_2\text{O}_3$  mixed oxides reported in the literature (Ref. 17 in the main text).
